# Supplementary material
Source: publisher figshare collection journal article supplement (https://frontiersin.figshare.com/ndownloader/files/13893272)
Supplement: Supplementary file [file 13893272]

## Supplementary Material

### The impact of coffee and caffeine on multiple sclerosis

A systematic review of beneficial or harmful and potential neuroprotective effects

Lena Herden, Robert Weissert\*,

\* Correspondence: Robert Weissert, MD PhD FAAN, [robert.weissert@ukr.de](mailto:robert.weissert@ukr.de)

**Supplementary Table 1:** Studies investigating the relationship between coffee or caffeine intake and Amyotrophic lateral sclerosis (ALS) and its animal model

|                 | References                     | Study design                                                                                                                  | Cases                                                                                                       | Findings                                                                                                                                                                                                   |
|-----------------|--------------------------------|-------------------------------------------------------------------------------------------------------------------------------|-------------------------------------------------------------------------------------------------------------|------------------------------------------------------------------------------------------------------------------------------------------------------------------------------------------------------------|
| Clinical trials | Fondell et al. 2015 US (78)    | Meta-analysis of five large cohort studies investigating the association between caffeine, coffee and tea and the risk of ALS | 1 010 000 cases with n=1279 ALS patients during a mean 18-year follow-up<br>Mean age at baseline 59.9 ± 8.1 | Caffeine intake was not associated with ALS risk, whether for men nor women, in none of the five individual studies.                                                                                       |
|                 | Beghi et al 2011 Italy (79)    | Case-control study on how caffeine intake is associated with the risk of ALS                                                  | n= 485 ALS patients n= 820 controls<br>Age 27-89                                                            | Coffee intake was less frequent among patients with ALS.(p=0,0004) There was an inverse relationship between ever coffee consumption versus never consumption and the risk of ALS (OR=0,6, 95% CI 0,4-0,8) |
|                 | Morozova et al. 2008 US (80)   | Prospective study among participants of the Cancer Prevention Study II                                                        | Cohort n=1186622<br>n= 923 ALS cases<br>Mean age: women 63, men 63.5                                        | Consumption of decaffeinated coffee was associated with an increased risk of ALS. There were no significant results about coffee, containing caffeine                                                      |
| Animal model    | Potenza et al. 2013 Italy (81) | Experimental study on how caffeine intake affected survival and/or motor performance in a transgenic model of ALS             | SOD1 <sup>G93A</sup> mice                                                                                   | Caffeine intake significantly shortened the survival of SOD1 <sup>G93A</sup> mice and induced a nonsignificant advancing of disease onset                                                                  |

**Supplementary Table 2: Studies examining the effect of coffee or caffeine on Parkinson's disease (PD)**

|                        | Reference                                        | Study                                                                                                                 | Cases                                                                                      | Findings                                                                                                                                                                                                                                                                                                                                                                                                      |
|------------------------|--------------------------------------------------|-----------------------------------------------------------------------------------------------------------------------|--------------------------------------------------------------------------------------------|---------------------------------------------------------------------------------------------------------------------------------------------------------------------------------------------------------------------------------------------------------------------------------------------------------------------------------------------------------------------------------------------------------------|
| <b>Clinical trials</b> | <i>Postuma et al. 2017 Canada (84)</i>           | Multicenter parallel-group controlled trial on caffeine as a symptomatic treatment                                    | n=60 caffeine group<br>Age $62.4 \pm 7.5$<br>n=61 placebo group<br>Age $62.3 \pm 8.4$      | Caffeine did not provide clinically important improvement of motor manifestations of PD                                                                                                                                                                                                                                                                                                                       |
|                        | <i>Ferreira et al. 2016 Portugal (18)</i>        | Prospective crossover placebo controlled study on the effect of espresso on daytime somnolence at PD                  | n=4 men<br>Age 47-75                                                                       | 3 blind crossover treatment periods allowed significant results. A beneficial therapeutic effect could have been shown in 50% of the patients                                                                                                                                                                                                                                                                 |
|                        | <i>Darweesh et al. 2015 Netherlands (A)</i>      | Comparing data from the first two sub cohorts of the Rotterdam Study on lifestyle factors, influencing the risk of PD | PD Cases in both studies<br>n=94<br>Age $69.3 \pm 9.1$ and<br>Age $64.5 \pm 7.9$           | No significant association between coffee consumption and the risk of developing PD could have been observed                                                                                                                                                                                                                                                                                                  |
|                        | <i>Kumar et al. 2015 Singapore (96)</i>          | Case-control study comparing caffeine intake effects on genetic high- and low-susceptibility to PD                    | 812 subjects<br>n=378 cases with PD<br>n= 434 controls<br>Age 25-90                        | Caffeine intake significantly reduces the risk of PD much more in those with high genetic susceptibility to PD compared to those with low genetic susceptibility to PD                                                                                                                                                                                                                                        |
|                        | <i>Van der Mark et al. 2014 Netherlands (97)</i> | Case-control study to investigate the possible risk of alcohol, coffee or smoking on PD                               | PD cases n=444, Controls n=876<br>Age 34-91                                                | Results observed some indication of a potential inverse relation between total and average coffee consumption and PD                                                                                                                                                                                                                                                                                          |
|                        | <i>Qi and Li 2014 China (B)</i>                  | A dose-response meta-analysis on coffee and caffeine consumption                                                      | n=492722 in coffee group and n=901764 in caffeine group                                    | Coffee and caffeine consumption have inverse associations with the risk of developing PD<br>Coffee at three cups/d (volume not identified): reduced risk of PD (RR=0.72, CI=0.65-0.81)                                                                                                                                                                                                                        |
|                        | <i>Palacios et al. 2012 US (87)</i>              | Prospective study on caffeine intake and risk of PD within the Cancer Prevention Study II Nutrition Cohort            | n=63590 women and n=48532 men with an 8 year follow up<br>Mean age 71 (men) and 69 (women) | Caffeine has a protective effect against the risk of developing PD<br><b>Men:</b> Caffeine at $\geq 274$ mg/d ( $\geq 2$ cups coffee/d) reduces risk of PD by 50% (RR=0.54, CI=0.37-0.80) vs 9.2 mg/d<br>Caffeine at 478 mg/d reduces risk of PD (RR=0.43, CI=0.26-0.71) vs 9.2 mg/d<br><b>Women:</b> Caffeine at 435 mg/d (3.2 cups coffee/d) reduces risk of PD by 40% (RR=0.61, CI=0.34-1.09) vs 5.6 mg/d. |
|                        | <i>Liu et al. 2012 US (88)</i>                   | Prospective study concerning whether caffeine intake or smoking is associated with risk of PD                         | n=318260 participants (61 year)<br>9-11 years follow up                                    | Caffeine has an inverse association with the risk of developing PD<br>Coffee at $>5$ cups/d: reduced risk of PD in men (OR=0.70, CI=0.47-1.04) and women (OR=0.74, CI=0.42-1.29) vs nonusers                                                                                                                                                                                                                  |
|                        | <i>Postuma et al. 2012 Canada (83)</i>           | 6-week randomized controlled trial of caffeine in PD. Primary outcome was the Epworth sleepiness scale (ESS)          | n= 31 placebo group<br>Age $67.8 \pm 11.2$<br>n=30 caffeine group<br>Age $65.2 \pm 8.3$    | Caffeine treatment in PD patients has potential motor benefits and improved total UPDRS (United Parkinson Disease Rating Scale) by 4.7 points. There were no significant changes in the ESS-score.                                                                                                                                                                                                            |
|                        | <i>Kandinov et al. 2009 Israel (112)</i>         | Retrospective analysis on the effect of coffee and tea on the onset of PD                                             | n= 278 PD patients                                                                         | Coffee consumption exceeding 3 cups per day advanced the age of PD onset by 4.8 years (p=0.03)                                                                                                                                                                                                                                                                                                                |

|                                                  |                                                                                                                            |                                                                                                                     |                                                                                                                                                                                                                                                                                                                                                                                          |
|--------------------------------------------------|----------------------------------------------------------------------------------------------------------------------------|---------------------------------------------------------------------------------------------------------------------|------------------------------------------------------------------------------------------------------------------------------------------------------------------------------------------------------------------------------------------------------------------------------------------------------------------------------------------------------------------------------------------|
| <i>Simon et al. 2008</i><br>US<br>(85)           | Analysis of the data of two studies, evaluating the relationship between caffeine intake and the rate of progression of PD | n=413 early PD cases<br>Age: patients older than 30 were included                                                   | Rate of progression of PD did not differ significantly between those in the highest and lowest quartiles for caffeine                                                                                                                                                                                                                                                                    |
| <i>Facheris et al. 2008</i><br>US<br>(98)        | Case-control study evaluating how genetic factors contribute to the effect of coffee on PD                                 | n=1208<br>446 case-unaffected sibling pairs and 158 case-unrelated control pairs<br>Age 31-87                       | No significant association between the ADORA2A, the CYP1A2 gene and the effect of coffee on PD could have been shown                                                                                                                                                                                                                                                                     |
| <i>Powers et al. 2008</i><br>US<br>(99)          | Case-control study to examine the association between smoking, coffee and NSAIDs and PD                                    | Cases n=1186, Controls n=928<br>Age 25-97                                                                           | A dose-dependent inverse relation between coffee intake and the risk PD was shown with higher significance in man than women                                                                                                                                                                                                                                                             |
| <i>Hu et al. 2007</i><br>Finland<br>(89)         | Prospective study on coffee and tea consumption and the risk of PD                                                         | n=15042 women n=14293 men<br>200 cases had a 12,9 years of follow-up<br>Age 25-74                                   | Coffee drinking is associated with lower risk of developing PD<br><b>Men:</b> 0, 1-4 cups, and >5 cups of coffee (100 mL/cup) had a hazard ratio of 1.00, 0.55 (CI=0.26-1.15) and 0.41 (CI=0.19-0.88), respectively, of PD<br><b>Women:</b> 0, 1-4 cups and >5 cups of coffee (100 mL/cup) had a hazard ratio of 1.00, 0.50 (CI=0.22-1.12) and 0.39 (CI=0.17-0.89), respectively, for PD |
| <i>Sääksjärvi et al. 2007</i><br>Finland<br>(90) | Prospective study to examine the prediction if coffee consumption on the incidence of PD                                   | Cohort of n= 6710 participants, after a 22-year follow-up PD cases were n=101<br>Age 30-75                          | Results suggest that high coffee consumption (< 10 cups/day) lead to reduction of risk for PD, but the protective effect of coffee may vary by exposure to other factors                                                                                                                                                                                                                 |
| <i>Kitagawa et al. 2007</i><br>Japan<br>(86)     | Prospective study, evaluating the effect of 100mg caffeine on freeze of gait (FOG) in PD                                   | n=16 patients<br>Age 56 -82                                                                                         | Caffeine improved "total akinesia" type of FOG, but had no effect on "trembling in place." Tolerance developed to the beneficial effect of caffeine on FOG within a few months, but a 2-week caffeine withdrawal period could restore the effect of caffeine                                                                                                                             |
| <i>Hancock et al. 2007</i><br>US<br>(100)        | Family-based Case-Control study to examine the effects of coffee, tea and soft drinks on PD                                | Cases n=356<br>Controls n=317, matched in age and sex<br>Age 66.1 ± 10.7                                            | Inverse associations of smoking and caffeine were shown. More than 2 cups/day were significantly inversely associated with PD (OR=0.64)                                                                                                                                                                                                                                                  |
| <i>Evans 2006</i><br>UK<br>(101)                 | Case-Control study to examine the effect of coffee, tea, chocolate milk and soft drinks on PD                              | Cases n=150<br>Controls n=150, matched in age and sex<br>Age 38-81                                                  | Higher caffeine intake was associated with lower risk of PD (OR=0.74, p=0.007)                                                                                                                                                                                                                                                                                                           |
| <i>Wirdefeldt et al. 2005</i><br>Sweden<br>(102) | Case-control study assessing the association between lifestyle factors and the risk of PD in a co-twin control study       | PD cases n= 476, Controls n= 2380<br>(415 same sex twin pairs)<br>Mean age 74.9 ± 8.6                               | No association between coffee and PD could have been observed.                                                                                                                                                                                                                                                                                                                           |
| <i>Ascherio et al. 2004</i><br>US<br>(92)        | Statistical analysis concerning the coffee intake and estrogen use                                                         | n=301.164 men and n=238.058 women 909 men and 349 women with a 10 year follow up<br>Mean age 57(men) and 56 (women) | Consumption of caffeinated coffee was associated with a reduced PD mortality among men and among women who never used postmenopausal estrogens.                                                                                                                                                                                                                                          |

## Supplementary Material

|                                                             |                                                                                                                                    |                                                                                                      |                                                                                                                                                                                    |
|-------------------------------------------------------------|------------------------------------------------------------------------------------------------------------------------------------|------------------------------------------------------------------------------------------------------|------------------------------------------------------------------------------------------------------------------------------------------------------------------------------------|
| <b>Ascherio et al. 2003</b><br><b>US</b><br><b>(91)</b>     | Statistical analysis concerning the coffee intake and estrogen use                                                                 | n=77713 women<br>n=154 women with a 18 year follow up<br>Age 30-55                                   | Use of postmenopausal hormones was associated with a lower risk of PD among women with low caffeine intake, but with an increased risk among women with high caffeine intake       |
| <b>Tan et al. 2003</b><br><b>Singapore</b><br><b>(103)</b>  | Case-control study to examine the relationship between coffee and tea intake, smoking and environmental factors and the risk of PD | Cases n=200<br>Controls n=200, matched in age and sex<br>Age 43-88                                   | A dose-dependent protective effect of PD could have been demonstrated for coffee (OR= 0.79, p=0.006)                                                                               |
| <b>Ragonese et al. 2003</b><br><b>Italy</b><br><b>(104)</b> | Case-control study investigating the association between smoking, alcohol, coffee intake and PD                                    | Cases n=150<br>Controls n=150, matched in age and sex<br>Age 31-81                                   | Results suggest a strong inverse association between coffee drinking and PD, in ever versus never coffee drinkers were evaluated (OR= 0.16, p=0.0001)                              |
| <b>Checkoway et al. 2002</b><br><b>US</b><br><b>(105)</b>   | Case-control study, observing the relationship between smoking, alcohol and caffeine intake and the risk of PD                     | n=210 cases and n=347 controls matched in age and sex<br>Age 37-88                                   | No association between risk of PD and coffee consumption or total caffeine intake                                                                                                  |
| <b>Paganini-Hill 2001</b><br><b>US</b><br><b>(106)</b>      | Case-control study assessing the risk factors for PD                                                                               | n=395 PD cases<br>2320 controls<br>Mean age 75±6,1                                                   | The risk of PD was significantly reduced among coffee drinkers, who drank at least 2 cups of coffee/day (OR= 0.64)                                                                 |
| <b>Ascherio 2001</b><br><b>US</b><br><b>(93)</b>            | Prospective cohort study evaluating the effect of coffee on the risk for PD                                                        | n=47351 men and n=88565 women, n=157 men 10 year follow up. n=131 women 16 year follow up, Age 40-75 | Highly significant inverse association between caffeine intake and risk of PD among men (p=0.001)                                                                                  |
| <b>Ross et al. 2000</b><br><b>US</b><br><b>(94)</b>         | Prospective cohort study concerning the association between coffee and caffeine intake and PD                                      | n=8004 men with 102 cases with 30 years follow up<br>Age 45-68                                       | Caffeine has an inverse association with the risk of developing PD. More than 421 mg of caffeine/d is associated with 5 times lower risk of developing PD vs nondrinkers (p<0.001) |
| <b>Benedetti et al. 2000</b><br><b>US</b><br><b>(107)</b>   | Case-control study on the association between coffee intake and smoking on PD                                                      | n=202 PD patients<br>n=202 controls<br>Age 41-97                                                     | Coffee was more common in controls than in cases (OR=0.35)                                                                                                                         |
| <b>Preux et al. 2000</b><br><b>France</b><br><b>(108)</b>   | Case-control study assessing environmental factors as risk for PD                                                                  | n=140 PD patients<br>n=280 controls<br>Mean age 71.1 ± 7.5                                           | No association between coffee intake and risk of PD                                                                                                                                |
| <b>Hern et al. 2000</b><br><b>(95)</b>                      | Prospective cohort study on the possible protective effect of coffee for PD                                                        | n= 8004 , n= 102 cases of PD during a 27-year follow-up, Average age 53                              | A dose-response relationship was observed. Higher amounts of coffee intake were associated with lower risk of developing PD                                                        |
| <b>Fall 1999</b><br><b>Sweden</b><br><b>(109)</b>           | Case-control study on nutritional factors influencing the risk of PD                                                               | n=113 PD patients n=263 controls<br>Age 30-86                                                        | No significant association has been found                                                                                                                                          |
| <b>Hellenbrand 1996</b><br><b>Germany</b><br><b>(110)</b>   | Case-control study to examine the association between coffee, tea and the risk of PD                                               | n=342 cases<br>n=342 controls<br>Mean age 56.2±6.7 (cases), 56.1 ±6.9 (controls)                     | Cases consumed less coffee (OR= 0.27, p=0.0003, highest versus lowest quartile) than controls                                                                                      |
| <b>Morano 1994</b><br><b>Spain</b><br><b>(111)</b>          | Case-control study on risk factors for PD                                                                                          | n=74 PD patients<br>n=148 controls                                                                   | No association between coffee drinking habits and risk of PD                                                                                                                       |

|                                        |                                                       |                                           |                                                            |
|----------------------------------------|-------------------------------------------------------|-------------------------------------------|------------------------------------------------------------|
| <i>Nefzger et al 1968</i><br>US<br>(C) | Retrospective study on smoking and coffee consumption | n=198 PD patients<br>n=198 other patients | No association between coffee consumption and onset of PD. |
|----------------------------------------|-------------------------------------------------------|-------------------------------------------|------------------------------------------------------------|

**Supplementary Table 3: Studies examining the effect of coffee and/or caffeine in animal model of PD**

|                     |                                             |                                                                                                                         |                                                                                                    |                                                                                                                                                                                                                                                                                                                                      |
|---------------------|---------------------------------------------|-------------------------------------------------------------------------------------------------------------------------|----------------------------------------------------------------------------------------------------|--------------------------------------------------------------------------------------------------------------------------------------------------------------------------------------------------------------------------------------------------------------------------------------------------------------------------------------|
| <b>Animal model</b> | <b>Bagga et al. 2015</b><br>US<br>(117)     | Evaluation of the neuroprotective effect in the MPTP model of PD by monitoring brain regions                            | C57BL5 mice (male, 4 months)<br>n=10 control<br>n=7 caffeine<br>n=10 MPTP<br>n=8 MPTP and caffeine | Caffeine reduces neuron damage in the striatum<br>Caffeine increases motor function (60.6% improvement in grip strength). Pretreatment with caffeine provides partial neuroprotection against severe striatal degeneration in PD.                                                                                                    |
|                     | <b>Sonsalla et al. 2012</b><br>US<br>(56)   | Experimental study investigating chronic caffeine treatment of rat brains                                               | Sprague Dawley rats<br>n=5 per group<br>Males Age not identified                                   | Caffeine reduces loss of nigral dopamine cell bodies at 1 <sup>st</sup> week or 3 <sup>rd</sup> week by 94% and 69%, respectively. Caffeine reduces microglia activation in the substantia nigra and protects against the loss of nigral dopamine neurons in a chronic progressive rat model of PD.                                  |
|                     | <b>Nakaso et al. 2008</b><br>Japan<br>(120) | Experimental study investigating cytoprotective mechanisms of caffeine                                                  | Human dopaminergic neuroblastoma cell lines                                                        | Caffeine reduces cell death and reduces the number of apoptotic nuclei from 13.1% to 9.7% under MPP+-exposed conditions<br>Caffeine reduces caspase 3 in a dose-dependent manner by 21%                                                                                                                                              |
|                     | <b>Xu et al. 2006</b><br>US<br>(116)        | Experimental study on the correlation between estrogen and caffeine, concerning the neuroprotective effects of caffeine | C57BL6 mice<br>n=3-7 saline treatment<br>n=4-15 MPTP<br>Young: 10 week<br>Old: 6-9 months          | Estrogen can prevent the neuroprotective effects of caffeine in a model of PD mice<br>Caffeine reduces MPTP-induced dopamine loss in a dose-dependent manner in male mice, with maximal effects achieved at 10 mg/kg.<br>In ovariectomized mice treated with estrogen, caffeine was neuroprotective only at higher doses (40 mg/kg). |
|                     | <b>Joghataie 2004</b><br>Iran<br>(118)      | Experimental study on the effect of caffeine to the brain of wistar rats.                                               | Adult male Wistar rats<br>n=72<br>18 per group                                                     | Caffeine administration for 1 month could attenuate the rotational behavior in lesioned rats and protect the neurons of SNC against 6-OHDA toxicity Nigrostriatal neurons within SNC were mainly preserved against neurodegenerative effects induced by the neurotoxin 6-OHDA                                                        |
|                     | <b>Chen et al. 2001</b><br>US<br>(114)      | Experimental study on the neuroprotective effects of caffeine and the inactivation of adenosine receptors               | C57BL6 mice (male 9 months)<br>n=13 MPTP<br>n=5 saline                                             | Caffeine (10 mg/kg): residual dopamine was 40% of control vs 15% of Control<br>Caffeine (20 mg/kg): reversed MPTP-induced dopamine depletion Caffeine at higher dosage caused excessive systemic toxicity                                                                                                                            |

**Additional references**

- A. Darweesh SK, Koudstaal PJ, Stricker BH, Hofman A, Ikram MA. Trends in the Incidence of Parkinson Disease in the General Population. *Am J Epidemiol* (2016) **183**(11):1018–26. doi:10.1093/aje/kwv271
- B. Qi H, Li S. Dose-response meta-analysis on coffee, tea and caffeine consumption with risk of Parkinson's disease. *Geriatr Gerontol Int* (2014) **14**(2):430–9. doi:10.1111/ggi.12123
- C. Nefzger D, Quadfasel FA, Karl VC. A retrospective study of smoking in parkinsons disease. *Am J Epidemiol* (1968) **88**(2):149–58.

## Research Strategy

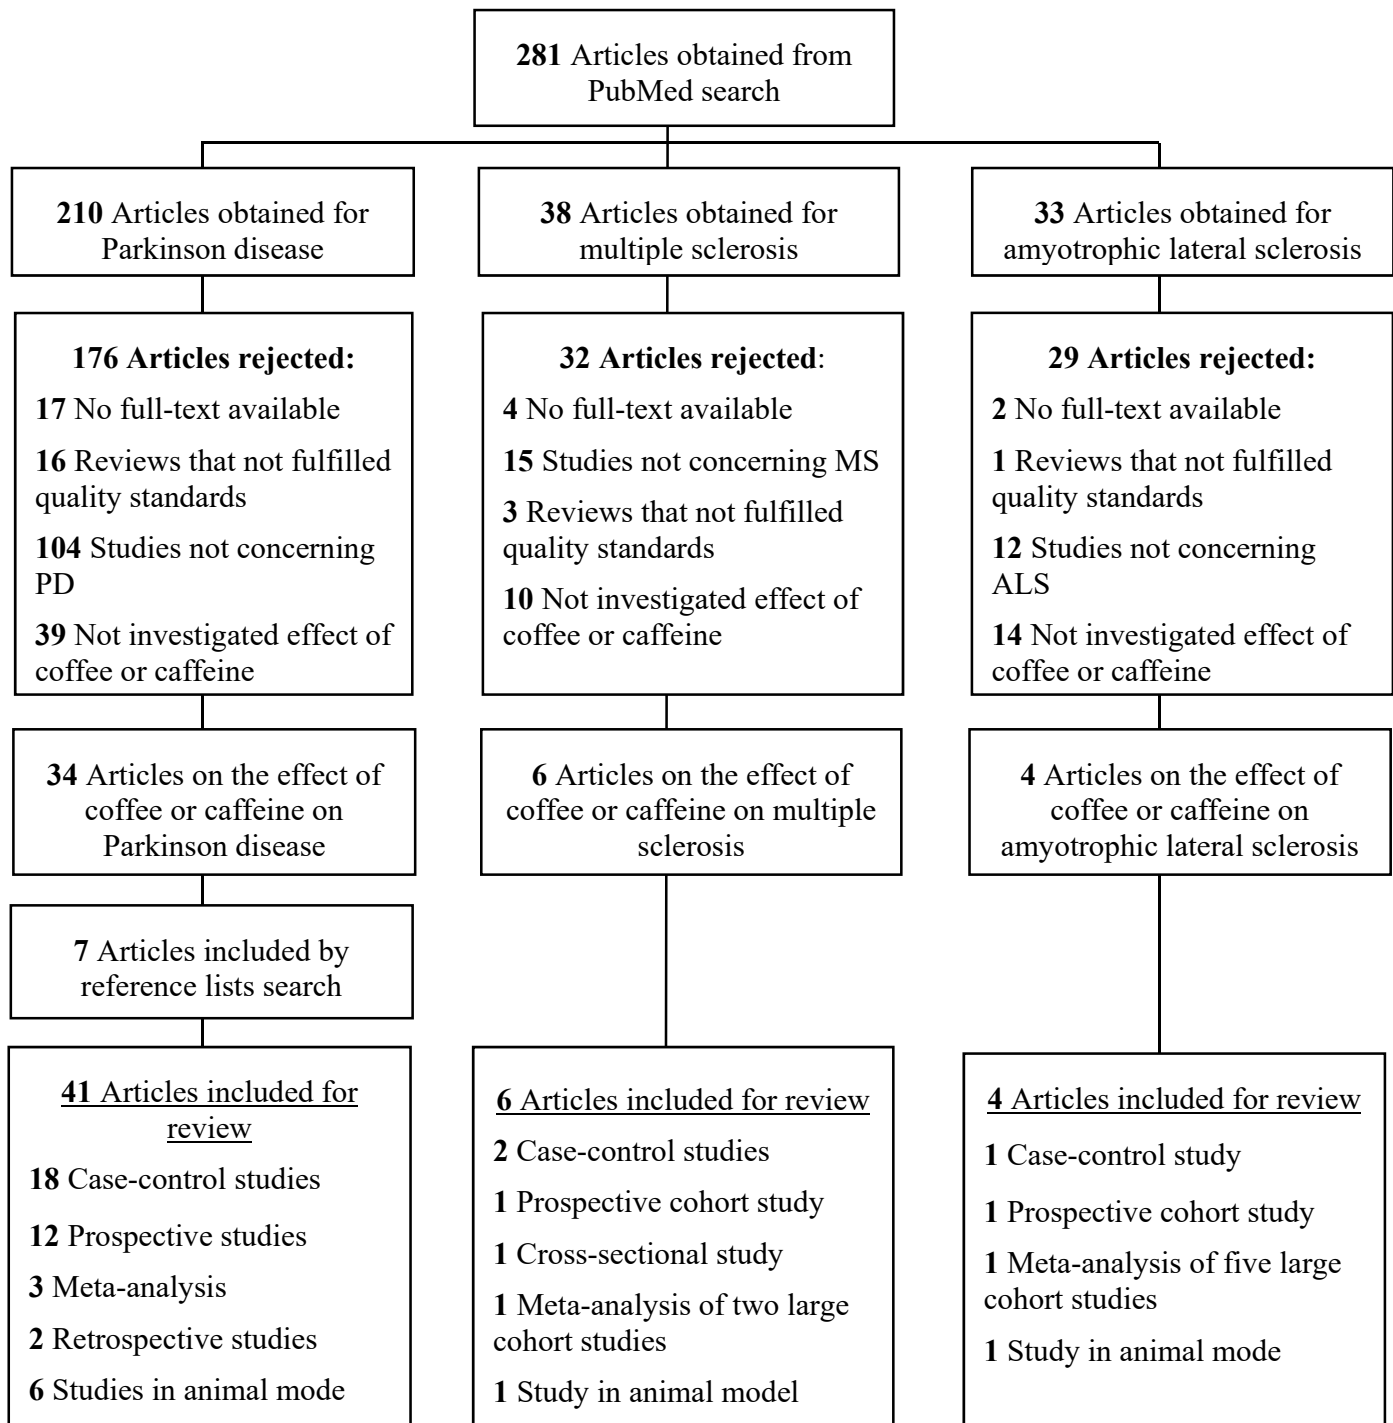

**Supplementary Figure 1:** Flow diagram of the study selection process.
